# Supplementary material
Source: publisher site journal article supplement (https://www.dovepress.com/article/522519)
Supplement: Supplementary file 1 [file Supplement%203.0.docx]

**Supplementary Online Content**

**Additional file 1.** Checklist of Recommendations for Reporting of Observational Studies Using the Reporting of StudiesConducted Using Observational Routinely Collected Health Data (RECORD) Guidelines

**Additional file 2.** The exact ingredients of the Xietu Hemu prescription.

**Additional file 3.** Sample size calculation.

**Additional file 4.** Baseline demographic and clinical characteristics of Different medication time cohorts vs. referent cohort.

**Additional file 5.** Comparisons of body composition and serum biomarkers in the patient exposure cohort (different XHP treatment duration cohorts) with those in the referent cohort before and after treatment are shown.

**Additional file 6.** Employ the DAG model to screen the independent variables.

**Additional file 7.** Change-in-Effects method CIE (Change-in-Estimate) analysis results.

**Additional file 1.** Checklist of Recommendations for Reporting of Observational Studies Using the Reporting of Studies

Conducted Using Observational Routinely Collected Health Data (RECORD) Guidelines

|  | Item No | Recommendation | Reported |
| --- | --- | --- | --- |
| Title and abstract | 1 | (a) Indicate the study's design with a commonly used term in the title or the abstract | Abstract |
|  |  | (b) Provide in the abstract an informative and balanced summary of what was done and what was found | Abstract |
| Introduction | | | |
| Background/rationale | 2 | Explain the scientific background and rationale for the investigation being reported | Introduction |
| Objectives | 3 | State-specific objectives, including any prespecified hypotheses | Introduction |
| Methods | | | |
| Study design | 4 | Present key elements of study design early in the paper | Methods-Study Design and Data Sources |
| Setting | 5 | Describe the setting, locations, and relevant dates, including periods of recruitment, exposure, follow-up, and data collection | Methods-Study Design and Data Sources |
| Participants | 6 | (a) Give the eligibility criteria and the sources and methods of selection of participants. Describe methods of follow-up | Methods-Study Design and Data Sources；Methods-Patients；Figure 1 |
|  |  | (b) For matched studies, give matching criteria and the number of exposed and unexposed | Methods-Groups and Endpoint event |
| Variables | 7 | Clearly define all outcomes, exposures, predictors, potential confounders, and effect modifiers. Give diagnostic criteria, if applicable | Methods-Study Design and Data Sources；G Methods-roups and Endpoint event |
| Data sources/measurement | 8 | For each variable of interest, give sources of data and details of methods of assessment (measurement). Describe comparability of assessment methods if there is more than one group | Methods-Groups and Endpoint event |
| Bias | 9 | Describe any efforts to address potential sources of bias | Methods-Statistical analysis |
| Study size | 10 | Explain how the study size was arrived at | Additional file 2 |
| Quantitative variables | 11 | Explain how quantitative variables were handled in the analyses. If applicable, describe which groupings were chosen and why | Methods-Groups and Endpoint event |
| Statistical methods | 12 | (a) Describe all statistical methods, including those used to control for confounding | Methods-Statistical analysis |
|  |  | (b) Describe any methods used to examine subgroups and interactions | Methods-Statistical analysis |
|  |  | (c) Explain how missing data were addressed | Not applicable |
|  |  | (d) If applicable, explain how loss to follow-up was addressed | Not applicable |
|  |  | (e) Describe any sensitivity analyses | Methods-Statistical analysis |
| Results | | | |
| Participants | 13 | (a) Report numbers of individuals at each stage of study--e.g. numbers potentially eligible, examined for eligibility, confirmed eligible, included in the study, completing follow-up, and analyzed | Results-Patient characteristics；  Figure 1 |
|  |  | (b) Give reasons for non-participation at each stage | Figure 1 |
|  |  | (c) Consider use of a flow diagram | Figure 1 |
| Descriptive data | 14 |  |  |
|  |  | (a) Give characteristics of study participants (e.g. demographic, clinical, social) and information on exposures and potential confounders | Results-Patient characteristics；  Table 1 |
|  |  | (b) Indicate number of participants with missing data for each variable of interest | Figure 1 |
|  |  | (c) Summarize follow-up time (e.g. average and total amount) | Not applicable |
| Outcome data | 15 | Report numbers of outcome events or summary measures over time | Results-Clinical outcomes；Figure 2；Table 2；Figure 3 |
| Main results | 16 | (a) Give unadjusted estimates and, if applicable, confounder-adjusted estimates and their precision (e.g. 95% confidence interval). Make clear which confounders were adjusted for and why they were included | Results-Clinical outcomes |
|  |  | (b) Report category boundaries when continuous variables were categorized | Figure 3 |
|  |  | (c) If relevant, consider translating estimates of relative risk into absolute risk for a meaningful time period | Not applicable |
| Other analyses | 17 | Report other analyses done--e.g. analyses of subgroups and interactions, and sensitivity analyses | Results-Clinical outcomes |
| Discussion | | | |
| Key results | 18 | Summarize key results with reference to study objectives | Discussion |
| Limitations | 19 | Discuss the limitations of the study, taking into account sources of potential bias or imprecision. Discuss both the direction and magnitude of any potential bias | Discussion |
| Interpretation | 20 | Give a cautious overall interpretation of results considering objectives, limitations, multiplicity of analyses, results from similar studies, and other relevant evidence | Discussion |
| Generalizability | 21 | Discuss the generalizability (external validity) of the study results | Discussion |
| Other information | | | |
| Funding | 22 | Give the source of funding and the role of the funders for the present study and, if applicable, for the original study on which the present article is based | Funding |

**Additional file 2.** The exact ingredients of the Xietu Hemu prescription.

| ****Medicinal Name**** | ****Identified Botanist**** | ****Voucher Specimen (Public Herbarium)**** | ****References**** |
| --- | --- | --- | --- |
| 党参/Codonopsis pilosula (Franch.) Nannf. 10g | Herb.Nat.Acad. | IBSC-0525519 | China Catalogue of Biodiversity 2025[1] |
| 黄芪/Astragalus membranaceus Moench 10g | Lingzhi Chen | PE-01609999 | China Catalogue of Biodiversity 2025 |
| 白术/ Atractylodes macrocephala Koidz.10g | Yilin Chen | PE-01837432 | China Catalogue of Biodiversity 2025 |
| 柴胡/Bupleurum chinense DC. 6g | Fei Liu | GZTM0061391 | China Catalogue of Biodiversity 2025 |
| 白芍/ Paeonia obovata var. glabra Makino 10 g | Courtois | NAS00184693 | China Catalogue of Biodiversity 2025 |
| 陈皮/ Citrus reticulata Blanco 6g | Taixing Chen | GZTM0020528 | China Catalogue of Biodiversity 2025 |
| 青皮/Capparis sepiaria Linn. 10g | S.K.M. | PE-01120242 | China Catalogue of Biodiversity 2025 |
| 半夏/Pinellia ternata Ten. ex Breitenb. 10g | Qi Lin | PE-02240649 | China Catalogue of Biodiversity 2025 |
| 黄芩/Scutellaria baicalensis Georgi 6g | Prof. SY Hu | PE-02111140 | China Catalogue of Biodiversity 2025 |
| 荷叶/ Adiantum reniforme Linn. var. sinense Y. X. Lin 10g | Y.S.Ling | PE-00049707 | China Catalogue of Biodiversity 2025 |
| 泽泻/Alisma plantago-aquatica Linn. 10g | Lichun Yan | PE-01981131 | China Catalogue of Biodiversity 2025 |
| 垂盆草/ Sedum sarmentosum Bunge 15 g | Bo Liu | PE-02112258 | China Catalogue of Biodiversity 2025 |
| 山楂/ Crataegus pinnatifida Bunge 10 g | Lingzhi Chen | PE-02109171 | China Catalogue of Biodiversity 2025 |
| 路路通/Liquidambar formosana Hance 10g | / | JXCM0008506 | China Catalogue of Biodiversity 2025 |

2 doses daily, within 30 minutes after breakfast and dinner.

[1] China Catalogue of Biodiversity. (2025). China Catalogue of Biodiversity 2025. Beijing: Science Press.

**Additional file 3.** Sample size calculation.

We retrospectively analyzed clinical data for the period 2021.11-2022.7 based on an absolute value of CAP reduction of up to 4.1% as an endpoint event. The results were as follows.

According to the following formula, in order to detect the occurrence of an endpoint event, which is consistent with the results of previous studies with a two-sided 5% significance level and a power of 90%, a sample size of 75 patients per cohort was necessary, given an anticipated drop out rate of 20%, and a final sample of 90 patients for each cohort to be included in this study was calculated, for a total of 180 patients.

|  | **Referent cohort** | **Exposure cohort** |
| --- | --- | --- |
| **Volume of medical records included** | 42 | 65 |
| **Effective cases** | 18 | 45 |
| **Invalid cases** | 24 | 20 |
| **Effective rate** | 42.86% | 69.23% |

**Additional file 4.** Baseline demographic and clinical characteristics of different XHP treatment duration cohorts vs. referent cohort.

| **Characteristic** | **All patients** | **referent cohort** | **4 weeks of continuous use of XHP cohort** | **8 weeks of continuous use of XHP cohort** | **12 weeks of continuous use of XHP cohort** | **≥16 weeks of continuous use of XHP cohort** | ***p-Value*** |
| --- | --- | --- | --- | --- | --- | --- | --- |
|  | **（n=262）** | **（n=99）** | **（n=28）** | **（n=60）** | **（n=51）** | **（n=24）** |  |
| **Sex, n (%)** |  |  |  |  |  |  | 0.062 |
| Male | 134(51.15) | 55(55.56) | 19(67.86) | 31(51.67) | 21(41.18) | 8(33.33) |  |
| Female | 128(48.85) | 44(44.44) | 9(32.14) | 29(48.33) | 30(58.82) | 16(66.67) |  |
| **Age, yr** | 40.97±13.12 | 42.00±13.71 | 46.25±10.40 | 40.00±11.29 | 37.65±12.75 | 37.30±18.48 | 0.796 |
| **Hypertension** |  |  |  |  |  |  | 0.044 |
| yes | 42(16.03) | 27(27.27) | 2(7.14) | 5(8.33) | 6(11.77) | 2(8.33) |  |
| no | 220(83.97) | 72(72.73) | 26(92.86) | 55(91.67) | 45(88.23) | 22(91.67) |  |
| **CI** |  |  |  |  |  |  | 0.506 |
| yes | 5(1.91) | 3(3.03) | 0(0) | 2(3.33) | 0(0) | 0(0) |  |
| no | 257(98.09) | 96(96.97) | 28(100) | 58(96.67) | 51(100) | 24(100) |  |
| **CHD** |  |  |  |  |  |  | 0.402 |
| yes | 2(0.76) | 1(1.01) | 1(3.57) | 0(0) | 0(0) | 0(0) |  |
| no | 260(99.24） | 98(98.99) | 27(96.43) | 60(100) | 51(100) | 24(100) |  |
| **DM** |  |  |  |  |  |  | 0.944 |
| yes | 143(54.58) | 58(58.59) | 14(50) | 32(53.33) | 26(50.98) | 14(58.33) |  |
| no | 119(45.42) | 42(42.41) | 14(50) | 28(46.67) | 25(49.02) | 10(41.67) |  |
| **Hashimoto Thyroiditis** | |  |  |  |  |  | 0.182 |
| yes | 53(20.23) | 13(13.13) | 7(25.00) | 13(21.67) | 15(29.41) | 5(20.83) |  |
| no | 209(79.77) | 86(86.87) | 21(75.00) | 47(78.33) | 36(70.59) | 19(79.17) |  |
| **Concomitant therapy** |  |  |  |  |  |  |  |
| **GLP-1RA** |  |  |  |  |  |  | 0.211 |
| yes | 82(31.30) | 37(37.37) | 6(21.43) | 17(28.33) | 12(23.53) | 10(41.67) |  |
| no | 180(68.70) | 62(62.63) | 22(78.57) | 43(71.67) | 39(76.47) | 14(58.33) |  |
| **SGLT-2i** |  |  |  |  |  |  | 0.213 |
| yes | 49(18.70) | 25(25.25) | 3(10.71) | 10(16.67) | 6(11.77) | 5(20.83) |  |
| no | 213(81.30) | 74(74.75) | 25(89.29) | 50(83.33） | 45(88.23) | 19(79.17) |  |
| **TZD** |  |  |  |  |  |  | 0.339 |
| yes | 7(2.67) | 5(5.05) | 1(3.57) | 1(1.67) | 0(0) | 0(0) |  |
| no | 255(97.33) | 94(94.95) | 27(96.43) | 59(98.33) | 51(100) | 24(100) |  |
| **metformin** |  |  |  |  |  |  | 0.367 |
| yes | 81(30.92) | 31(31.31) | 7(25.00) | 23(38.33) | 16(31.37) | 4(16.67) |  |
| no | 181(69.08) | 68(68.69) | 21(75.00) | 37(61.67) | 35(68.63) | 20(83.33) |  |
| **insulin** |  |  |  |  |  |  | 0.135 |
| yes | 20(7.63) | 11(11.11) | 4(14.29) | 3(5.00) | 2(3.92) | 0(0) |  |
| no | 242(92.37) | 88(88.89) | 24(85.71) | 57(95.00) | 49(96.08) | 24(100) |  |
| **Euthyrox** |  |  |  |  |  |  | 0.010 |
| yes | 21(8.02） | 2(2.02) | 4(14.29) | 5(8.33) | 9(17.65) | 1(4.17) |  |
| no | 241（91.98） | 97(97.98) | 24(85.71) | 55(91.67) | 42(82.35) | 23(95.83) |  |
| **CAP(dB/m)** | 302.50(274.75,330.00) | 295.00(276.00,311.50) | 287.50(264.25,324.50) | 324.00(294.00,340.50) | 310.50(279.75,339.50) | 303.50(261.00,337.75) | 0.168 |
| **LSM(kPa)** | 6.00(4.70,7.58) | 5.50(4.25,7.20) | 5.45(4.05,7.33) | 6.10(4.55,7.55) | 6.80(5.05,8.28) | 7.70(6.28,10.20) | 0.340 |
| **Height(cm)** | 166.00(156.00,166.00) | 169.50(159.75,174.75) | 170.00(161.13,172.00) | 166.50(160.00,174.75) | 163.50(160.50,169.63) | 160.75(158.88,167.38) | 0.240 |
| **BMI(kg/m2)** | 28.40(25.43,32.30) | 27.70(24.35,33.05) | 28.00(24.35,30.05) | 27.30(25.10,32.50) | 29.85(28.43,34.53) | 28.40(26.18,30.85) | 0.269 |
| **WHR** | 0.94(0.90,0.98) | 0.92(0.90,0.99) | 0.96(0.87,1.00) | 0.95(0.92,0.98) | 0.98(0.93,1.00) | 0.92(0.89,0.95) | 0.538 |
| **VFA(cm2)** | 125.35(94.50,163.13) | 115.10(91.05,159.95) | 123.55(73.33,161.78) | 110.90(90.40,160.00) | 149.05(127.45,185.18) | 124.25(107.35,162.13) | 0.247 |
| **waistline(cm)** | 94.62(89.37,107.12) | 91.27(86.23,106.87) | 94.29(86.66,102.78) | 94.72(89.98,106.82) | 104.22(93.74,109.19) | 93.29(88.40,100.12) | 0.573 |
| **AST(U/L)** | 22.00(17.00,32.00) | 22.00(16.00,31.50) | 22.00(18.25,28.75) | 21.00(18.50,32.00) | 25.50(19.25,43.50) | 17.50(15.25,28.50) | 0.903 |
| **ALT(U/L)** | 31.00(21.50,52.00) | 31.00(18.50,52.50) | 28.00(24.25,51.25) | 33.00(26.50,46.00) | 44.50(24.00,66.75) | 20.00(17.25,54.00) | 0.646 |
| **ALP(U/L)** | 85.00(70.00,101.75) | 81.00(66.00,96.00) | 84.00(74.50,95.25) | 87.00(70.00,103.00) | 88.50(68.75,104.75) | 103.50(74.00,116.25) | 0.539 |
| **GGT(U/L)** | 37.00(24.25,64.75) | 30.00(21.50,50.50) | 38.00(21.50,69.75) | 47.00(35.50,74.50) | 45.50(22.00,81.75) | 27.00(18.25,50.90) | 0.209 |
| **TG(mmol/L)** | 1.60(1.10,2.65) | 1.53(1.22,2.64) | 1.50(0.96,2.87) | 1.76(1.10,2.85) | 1.90(0.92,2.77) | 1.41(1.21,2.23) | 0.942 |
| **TC(mmol/L)** | 4.95(4.30,5.55) | 4.99(4.35,5.38) | 5.14(4.49,5.58) | 4.66(4.13,5.30) | 5.07(4.53,5.92) | 4.47(3.42,5.94) | 0.474 |
| **HDL(mmol/L)** | 1.06(0.93,1.21) | 1.23(1.13,1.39) | 1.21(0.96,1.55) | 1.13(0.99,1.29) | 1.13(1.10,1.45) | 1.07(0.97,1.37) | 0.424 |
| **LDL(mmol/L)** | 2.84(2.39,3.39) | 2.91(2.40,3.25) | 2.87(2.39,3.56) | 2.78(2.22,2.94) | 3.23(2.46,3.70) | 2.61(2.41,3.60) | 0.929 |
| **HbA1c%** | 6.50(5.80,7.40) | 6.50(5.95,8.10) | 6.50(5.78,7.00) | 6.50(5.75,7.85) | 6.45(5.73,6.68) | 6.25(5.38,7.05) | 0.371 |
| **FBG(mmol/L)** | 6.23(5.35,7.91) | 6.22(5.23,7.95) | 6.48(5.60,7.61) | 6.93(5.44,8.73) | 5.66(5.04,6.83) | 6.29(5.24,9.22) | 0.923 |
| **HOMA-IS** | 0.32(0.22,0.52) | 0.34(0.23,0.54) | 0.33(0.24,0.49) | 0.32(0.23,0.48) | 0.29(0.21,0.59) | 0.24(0.17,0.36) | 0.598 |
| **NFS** | -30.00(-32.00,-28.00) | -30.00(-32.00,-28.00) | -30.00(-31.00,-27.50) | -30.00(-33.00,-29.50) | -30.00(-31.75,-28.00) | -29.50(-35.00,-28.00) | 0.450 |
| **FIB-4** | 0.68(0.47,1.02) | 0.67(0.48,1.14) | 0.78(0.64,1.16) | 0.69(0.53,0.91) | 0.59(0.37,1.05) | 0.47(0.28,1.08) | 0.247 |
| **FLI** | 67.00(37.25,90.00) | 64.00(27.00,90.00) | 65.00(34.25,88.25) | 73.00(43.50,90.00) | 80.00(62.75,95.75) | 52.50(34.50,75.50) | 0.524 |
| **FAST** | -1.89(-2.68,-0.54) | -1.99(-2.80,-0.98) | -2.04(-2.65,-1.09) | -2.02(-2.33,-0.37) | -0.53(-2.61,0.08) | -2.04(-3.22,-0.53) | 0.859 |
| **TCM syndrome scores** | 11.00(9.00,14.00) | 11.00(9.00,14.00) | 11.50(10.00,14.00) | 13.00(9.00,15.00) | 13.50(8.00,14.75) | 10.00(9.00,11.75) | 0.510 |

CI, cerebral infarction; CHD, coronary heart disease; DM, Diabetes mellitus; BMl, body mass index; WHR, waist-to-hip ratio;VFA, Visceral fat area; ALT, Alanine aminotransferase; AST, Aspartate aminotransferase; ALP, Alkaline phosphatase; GGT, Gamma glutamyl transpeptidase; HbA1c, hemoglobin A1c; FIB-4, Fibrosis 4 Score; FLI, Fatty Liver Index; FAST, FibroScan-AST; NFS, NAFLD Fibrosis Score; FPG, Fasting plasma glucose; HOMA, Homeostasis model assessment; GLP-1RA, Glucagonlike peptide-1 receptor agonist; TZD, Thiazolidinedione; SGLT-2i, Sodium-glucose cotransporters-2 inhibitors.

**Additional file 5.** Comparisons of body composition and serum biomarkers in the patient exposure cohort (different XHP treatment duration cohorts) with those in the referent cohort before and after treatment are shown.

| **Characteristic** |  | **referen**t cohort | **4 weeks of continuous use of XHP cohort** | **8 weeks of continuous use of XHP cohort** | **12 weeks of continuous use of XHP cohort** | **≥16 weeks of continuous use of XHP cohort** | **Stats.** | ***P*** |
| --- | --- | --- | --- | --- | --- | --- | --- | --- |
| **CAP(dB/m)** | Pre | 296.26±29.01 | 293.13±38.09 | 310.41±37.15 | 312.12±31.60 | 312.67±43.20 | 1.702 | 0.15 |
|  | Post | 291.34±36.50 | 262.25±41.34 | 287.50±35.36* | 287.18±37.56 | 270.00±21.85 | 0.825 | 0.51 |
|  | Stats. | 1.305 | 3.393 | 5.122 | 2.864 | 2.708 |  |  |
|  | *P* | 0.195 | 0.002 | <0.001 | 0.006 | 0.013 |  |  |
| **LSM(kPa)** | Pre | 5.50(4.10,6.60) | 5.60(4.05,7.85) | 6.05(4.48,7.53) | 6.50(4.48,7.53) | 8.15(6.85,10.20) | 4.521 | 0.340 |
|  | Post | 5.50(4.70,6.60) | 5.30(3.38,6.43) | 5.15(4.05,7.30) | 6.60(5.30,8.55) | 6.55(4.93,8.88) | 3.347 | 0.501 |
|  | Stats. | -0.175 | -1.879 | -2.413 | -2.021 | -2.429 |  |  |
|  | *P* | 0.861 | 0.060 | 0.016 | 0.043 | 0.015 |  |  |
| BMI(kg/m2) | Pre | 27.10(24.30,32.10) | 26.35(23.93,32.43) | 26.70(25.10,28.78) | 29.90(27.45,35.00) | 28.40(25.15,29.58) | 5.181 | 0.269 |
|  | Post | 26.80(24.80,32.70) | 24.75(22.93,31.55) | 26.05(24.80,32.70) | 30.30(26.40,33.40) * | 26.20(24.78,27.93) | 6.298 | 0.178 |
|  | Stats. | -2.01 | -3.254 | -4.565 | -4.886 | -2.99 |  |  |
|  | *P* | 0.044 | 0.001 | <0.001 | <0.001 | 0.003 |  |  |
| **WHR** | Pre | 0.94±0.06 | 0.93±0.06 | 0.95±0.04 | 0.96±0.06 | 0.91±0.04 | 0.902 | 0.463 |
|  | Post | 0.94±0.06 | 0.91±0.08 | 0.92±0.04* | 0.95±0.05 | 0.91±0.02 | 1.410 | 0.231 |
|  | Stats. | 0.068 | 2.006 | 5.387 | 3.871 | 0.527 |  |  |
|  | *P* | 0.946 | 0.056 | <0.001 | <0.001 | 0.604 |  |  |
| VFA(cm2) | Pre | 115.10(90.70,159.00) | 95.15(73.33,148.30) | 109.05(90.75,142.45) | 141.30(124.85,195.80) | 115.50(95.50,149.08) | 5.422 | 0.247 |
|  | Post | 109.70(80.50,151.90) | 86.85(63.10,139.38) | 97.90(73.60,126.90) * | 135.10(120.80,163.15) | 102.85(93.65,127.98) | 5.931 | 0.204 |
|  | Stats. | -1.273 | -1.994 | -4.843 | -4.098 | -2.494 |  |  |
|  | *P* | 0.203 | 0.046 | <0.001 | <0.001 | 0.013 |  |  |
| **NFS** | Pre | -31.00(-32.00,-28.00) | -30.50(-31.75,27.00) | -30.00(-33.25,-30.00) | -30.00(-31.50,-28.50) | -29.00(-32.00,-27.50) | 3.689 | 0.450 |
|  | Post | -29.00(-30.00,-27.00) | -28.50(-29.75,-28.00) | -29.00(-31.00,-28.00) | -31.00(-32.00,-28.00) | -29.00(-31.00,-24.00) | 1.732 | 0.785 |
|  | Stats. | -2.617 | -1.781 | -3.373 | -0.209 | -1.604 |  |  |
|  | *P* | 0.009 | 0.075 | 0.001 | 0.835 | 0.109 |  |  |
| **FIB-4** | Pre | 0.67(0.44,1.27) | 0.93(0.75,1.16) | 0.68(0.55,0.95) | 0.75(0.35,0.99) | 1.39(0.78,2.14) | 5.423 | 0.785 |
|  | Post | 0.73(0.51,1.26) | 0.95(0.70,1.46) | 0.67(0.51,0.95) | 0.61(0.35,1.09) | 1.26(0.92,1.62) | 3.942 | 0.414 |
|  | Stats. | -1.66 | <0.001 | -0.274 | -0.639 | -0.314 |  |  |
|  | P | 0.097 | 1.000 | 0.784 | 0.523 | 0.753 |  |  |
| **FLI** | Pre | 65.00(27.00,90.00) | 66.50(22.25,89.00) | 69.00(44.25,80.50) | 88.00(49.00,96.50) | 39.00(32.25,70.00) | 3.205 | 0.524 |
|  | Post | 60.00(28.00,87.00) | 47.50(17.00,89.00) | 43.50(29.00,73.75) * | 77.00(55.00,90.00) | 35.50(17.00,54.25) | 3.419 | 0.490 |
|  | Stats. | -0.695 | -1.889 | -3.504 | -1.513 | -1.778 |  |  |
|  | *P* | 0.487 | 0.059 | <0.001 | 0.130 | 0.075 |  |  |
| **FAST** | Pre | -2.10±1.32 | -1.93±0.74 | -1.67±1.34 | -1.51±1.89 | -1.55±1.32 | 1.091 | 0.362 |
|  | Post | -2.47±1.26 | -2.49±1.04 | -2.76±1.41 | -2.55±2.21 | -2.49±0.94 | 0.993 | 0.413 |
|  | Stats. | 2.403 | 1.689 | 4.838 | 2.024 | 2.784 |  |  |
|  | *P* | 0.019 | 0.109 | <0.001 | 0.530 | 0.019 |  |  |

*: Compared with the non-exposed group: P < 0.05.

**Additional file 6.** Employ the Directed Acyclic Graph (DAG) model to screen the independent variables.


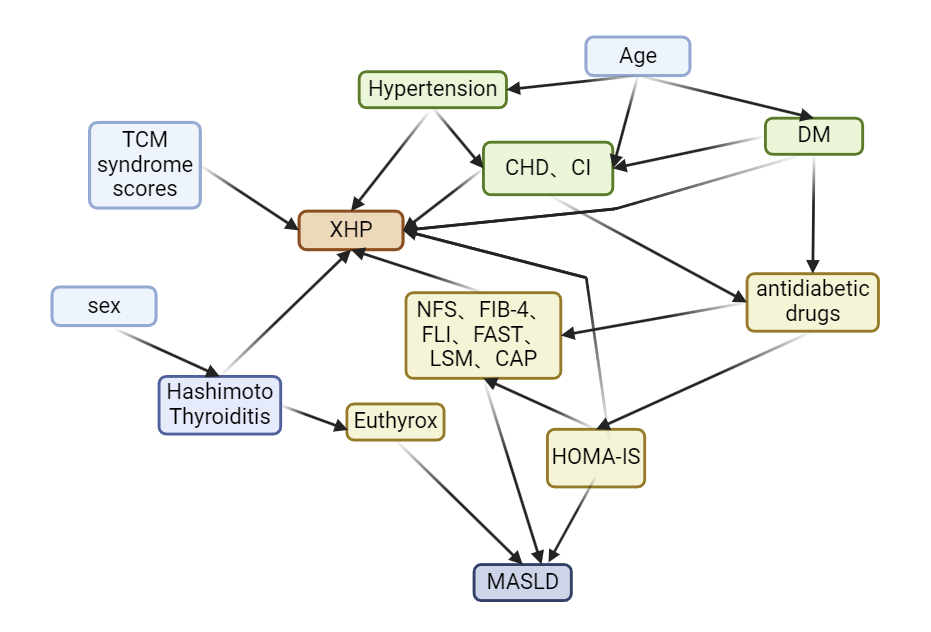


**Additional file 7.** Change-in-Effects method CIE (Change-in-Estimate) analysis results.

| **Characteristic** | 1st round | 2nd round | 3rd round | 4th round | 5th round | 6th round | 7th round | 8th round | 9th round | 10th round | 11th round | 12th round | 13th round | 14th round | 15th round | 16th round |
| --- | --- | --- | --- | --- | --- | --- | --- | --- | --- | --- | --- | --- | --- | --- | --- | --- |
| **Age** | 5.416 | 5.439 | 5.432 | 5.486 | 5.463 |  |  |  |  |  |  |  |  |  |  |  |
| **Sex** | 5.839 | 5.752 | 5.771 | 5.770 | 5.742 | 5.732 | 5.857 | 5.754 | 5.777 | 5.437 |  |  |  |  |  |  |
| **CI** | 5.942 | 5.933 | 5.891 | 5.931 | 5.925 | 5.853 | 5.859 | 5.811 | 5.911 | 5.787 | 5.769 | 5.765 | 5.581 |  |  |  |
| **Hypertension** | 4.957 | 4.923 | 4.771 | 4.785 | 4.754 | 4.583 | 4.617 | 4.797 | 4.875 | 4.841 | 5.007 | 5.001 | 4.968 | 4.898 | 4.838 | 4.560 |
| **CHD** | 5.366 | 5.370 | 5.378 | 5.411 | 5.408 | 5.284 | 5.370 | 5.239 | 5.334 | 5.212 | 5.004 | 5.000 | 4.908 | 5.054 | 4.869 | 4.575 |
| **DM** | 5.553 | 5.552 | 5.581 |  |  |  |  |  |  |  |  |  |  |  |  |  |
| **Hashimoto Thyroiditis** | 5.575 | 5.600 | 5.602 | 5.634 | 5.634 | 5.529 |  |  |  |  |  |  |  |  |  |  |
| **GLP-1RA** | 4.840 | 4.844 | 4.851 | 4.936 | 4.965 | 4.896 | 4.879 | 4.699 | 4.765 | 4.825 | 4.767 | 4.799 | 4.935 | 5.193 | 5.077 |  |
| **SGLT-2i** | 5.507 | 5.542 |  |  |  |  |  |  |  |  |  |  |  |  |  |  |
| **TZD** | 5.588 | 5.592 | 4.876 | 5.647 | 5.632 | 5.522 | 5.612 | 5.631 |  |  |  |  |  |  |  |  |
| **metformin** | 5.231 | 5.276 | 4.723 | 5.307 | 5.321 | 5.154 | 5.198 | 5.338 | 5.415 | 5.310 | 5.304 | 5.288 | 5.215 | 5.461 |  |  |
| **Euthyrox** | 5.540 |  |  |  |  |  |  |  |  |  |  |  |  |  |  |  |
| **insulin** | 5.212 | 5.249 | 4.710 | 5.328 | 5.332 | 5.190 | 5.294 | 5.151 | 5.190 | 5.165 | 5.038 | 5.003 | 4.836 | 4.720 | 4.472 | 4.350 |
| **TCM syndrome scores** | 5.500 | 5.528 | 4.844 | 5.571 |  |  |  |  |  |  |  |  |  |  |  |  |
| **HOMA-IS** | 5.258 | 5.402 | 4.897 | 5.188 | 5.217 | 5.116 | 5.150 | 5.030 | 5.079 | 5.010 | 5.227 | 5.198 | 4.756 | 4.906 | 4.838 | 4.353 |
| **NFS** | 5.885 | 5.870 | 5.085 | 5.922 | 5.892 | 5.761 | 5.815 | 5.814 | 5.920 | 4.888 | 5.003 | 4.519 | 4.486 | 4.620 | 4.548 | 4.214 |
| **FIB-4** | 5.159 | 5.193 | 4.707 | 5.241 | 5.192 | 5.299 | 5.363 | 5.390 | 5.480 |  |  |  |  |  |  |  |
| **FLI** | 5.681 | 5.678 | 4.840 | 5.749 | 5.708 | 5.500 | 5.545 |  |  |  |  |  |  |  |  |  |
| **FAST** | 5.001 | 4.992 | 4.600 | 5.009 | 4.985 | 4.995 | 5.007 | 5.274 | 5.345 | 5.371 | 5.412 |  |  |  |  |  |
| **LSM** | 4.845 | 4.826 | 4.454 | 4.864 | 4.848 | 4.852 | 4.909 | 5.060 | 5.136 | 5.031 | 5.075 | 5.333 |  |  |  |  |
